# Supplementary material for: The interaction of physical structure and nutrient loading drives ecosystem change in a large tropical lake over 40 years
Source: bioRxiv or medRxiv preprint supplement (doi:10.1101/2020.10.21.347393), 2022-03-09
Supplement: Supplementary file [file media-1.pdf]

Supplemental Table 1: Schmidt Stability Index (SSI) monthly comparisons.

|                  | January                      | February                  | March             | April             | May                        | June              | July                       | August                       | September        | October                   | November          | December                     |
|------------------|------------------------------|---------------------------|-------------------|-------------------|----------------------------|-------------------|----------------------------|------------------------------|------------------|---------------------------|-------------------|------------------------------|
| Legacy mean      | 1580.10                      | 1222.87                   | 1926.41           | 2131.13           | 3518.55                    | 2088.67           | 2140.94                    | 1894.43                      | 849.59           | 946.43                    | 117.31            | 359.99                       |
| Contemporay mean | 114.74                       | 696.77                    | 1029.30           | 1809.66           | 2456.07                    | 2476.55           | 1104.10                    | 820.29                       | 1040.86          | 399.44                    | 63.54             | 45.69                        |
| <i>p</i>         | <b>&lt;0.001</b><br>(df= 93) | <b>0.0397</b><br>(df= 84) | 0.078<br>(df= 92) | 0.585<br>(df= 89) | <b>0.00678</b><br>(df= 88) | 0.583<br>(df= 76) | <b>0.00102</b><br>(df= 80) | <b>&lt;0.001</b><br>(df= 82) | 0.52<br>(df= 76) | <b>0.0392</b><br>(df= 62) | 0.526<br>(df= 61) | <b>&lt;0.001</b><br>(df= 61) |
